# Supplementary material for: Modification of a Constitutive to Glucose-Responsive Liver-Specific Promoter Resulted in Increased Efficacy of Adeno-Associated Virus Serotype 8-Insulin Gene Therapy of Diabetic Mice
Source: MDPI journal article supplement (doi:10.3390/cells9112474), 2020-11-13
Supplement: s1 [file s1]

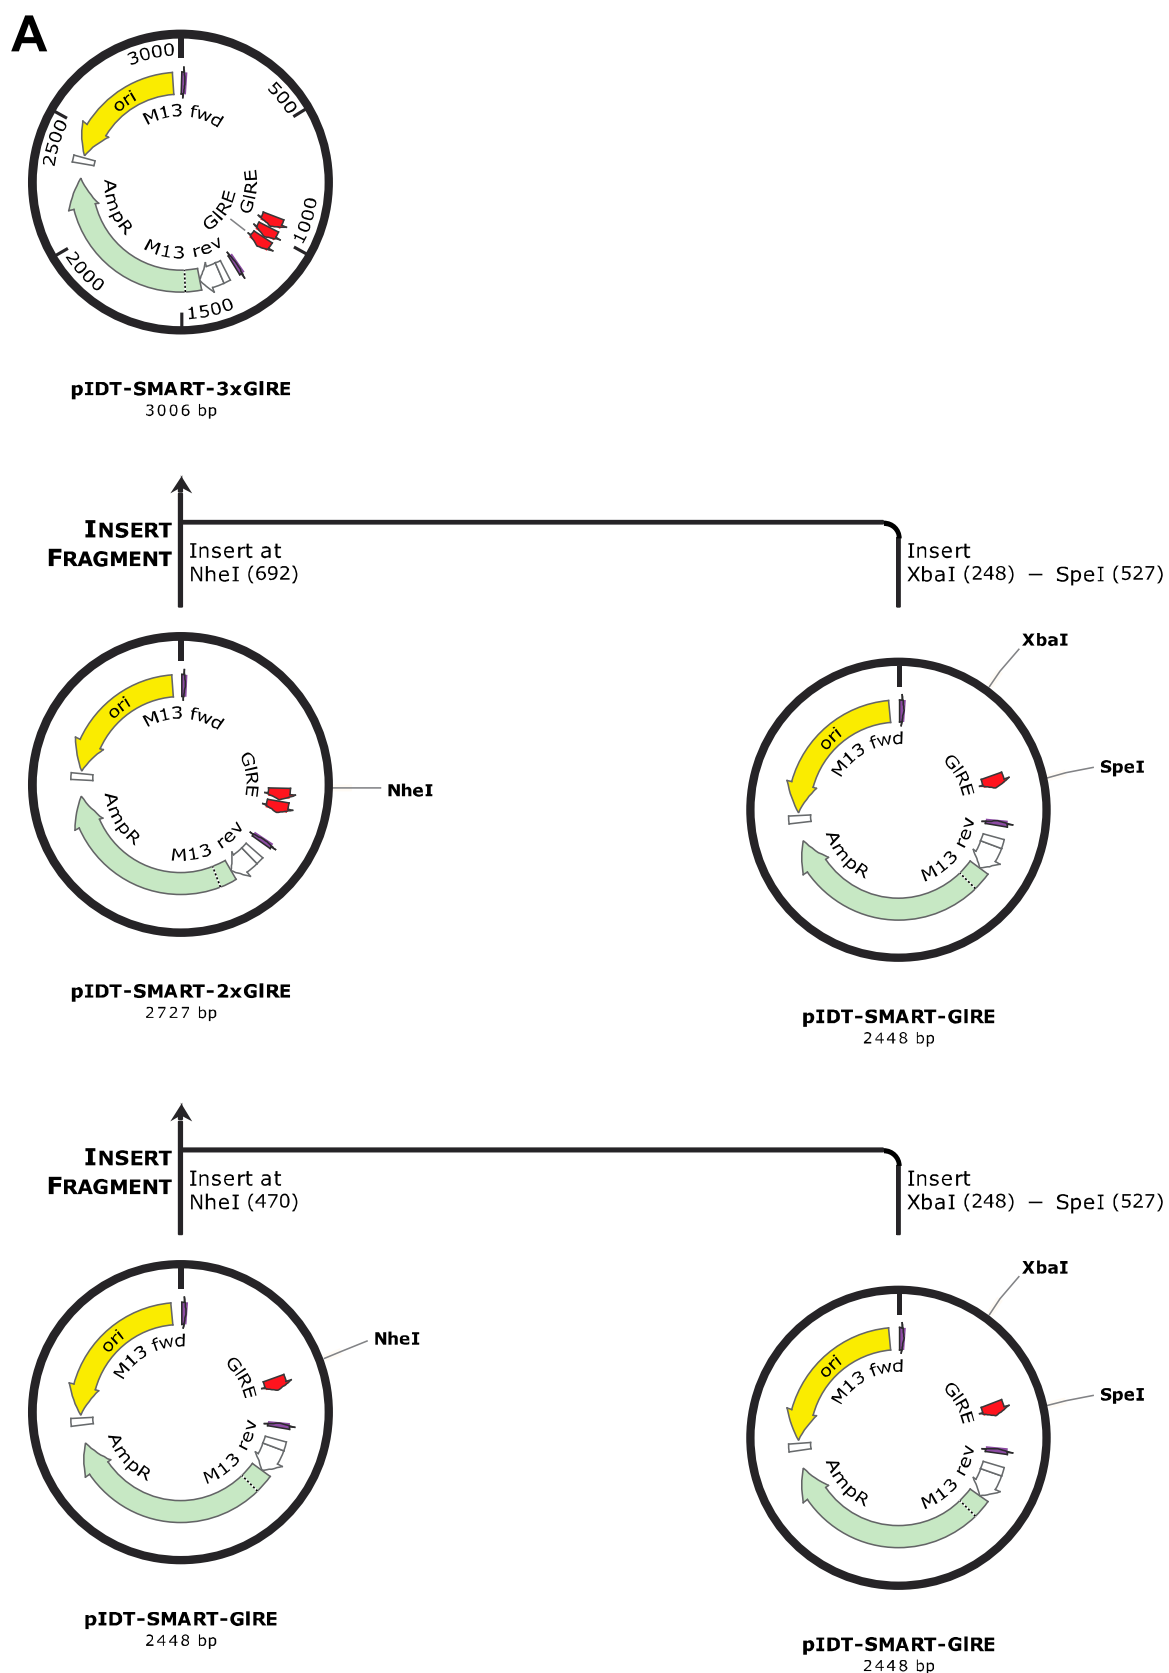

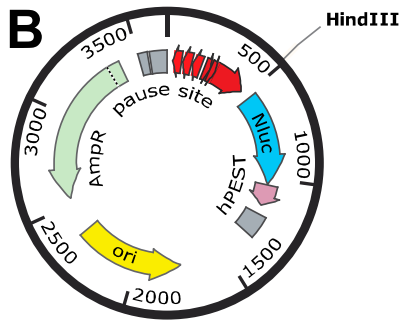

**pR3GHP-NlucP**  
3657 bp

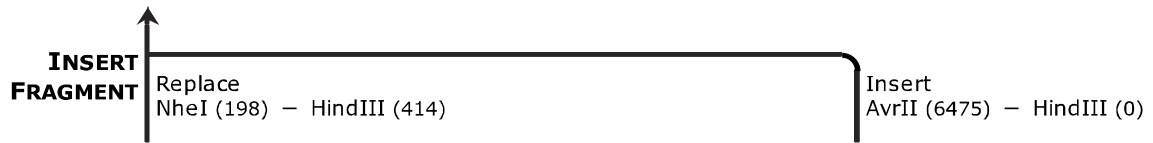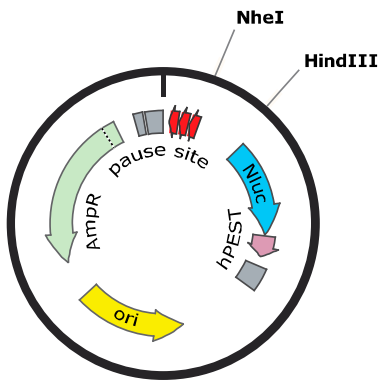

**pNL1.2-R3G[NlucP]**  
3582 bp

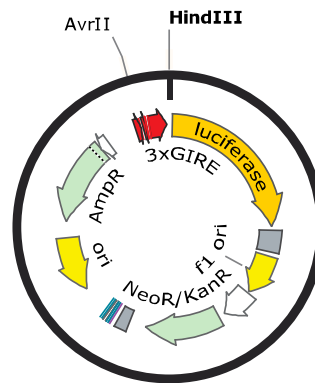

**p3GHP-Luc**  
6766 bp

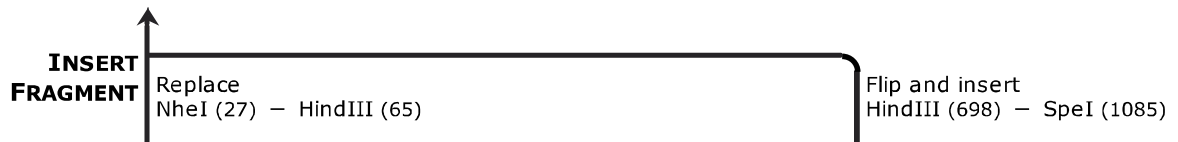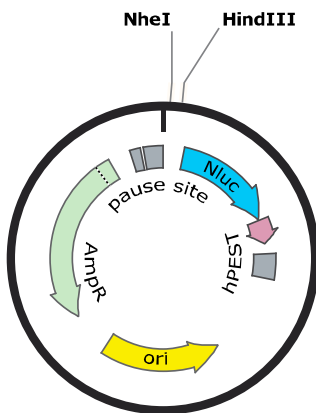

**pNL1.2[NlucP]**  
3233 bp

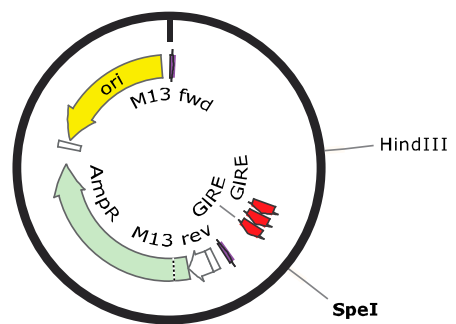

**pIDT-SMART-3xGIRE**  
3006 bp

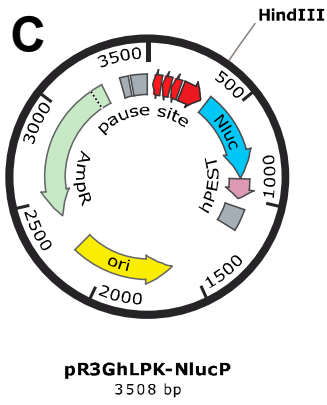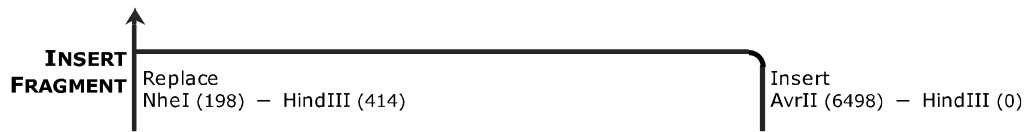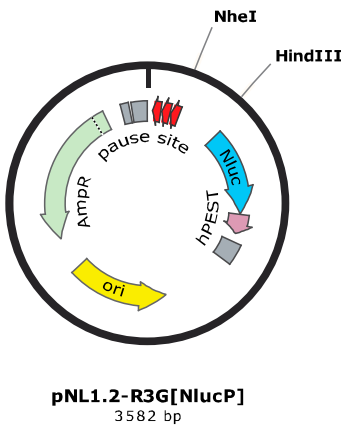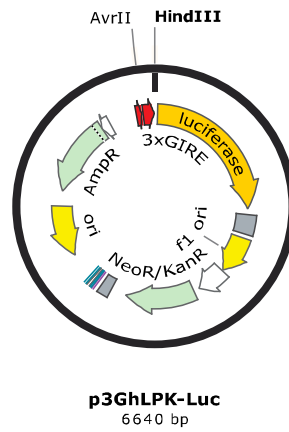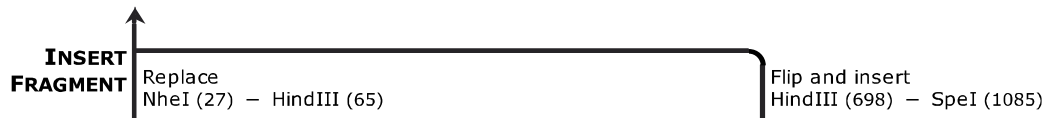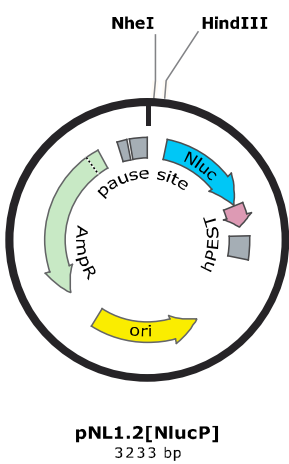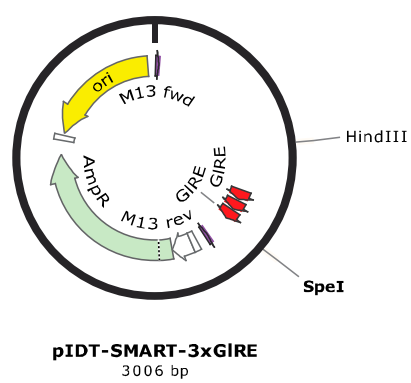

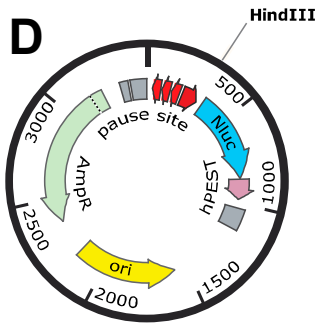

**pR3GrLPK-NlucP**  
3477 bp

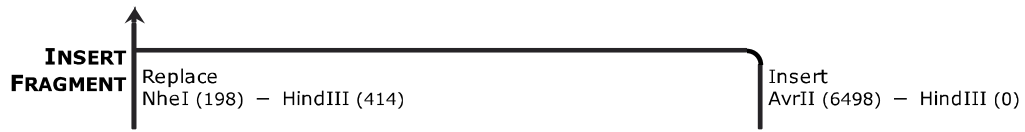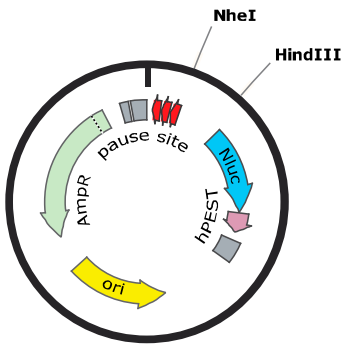

**pNL1.2-R3G[NlucP]**  
3582 bp

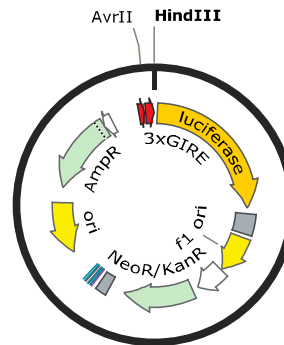

**p3GrLPK-Luc**  
6609 bp

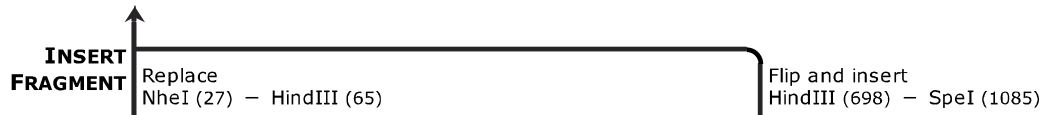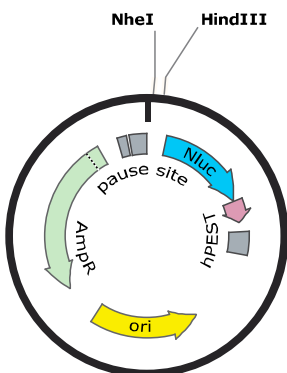

**pNL1.2[NlucP]**  
3233 bp

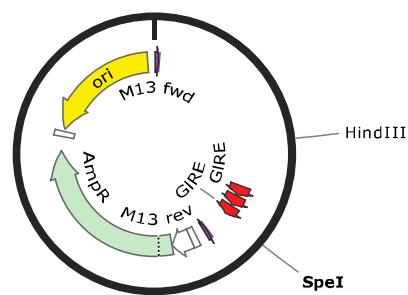

**pIDT-SMART-3xGIRE**  
3006 bp

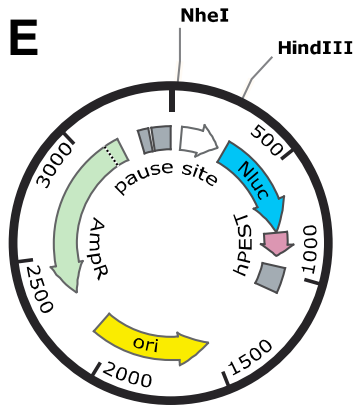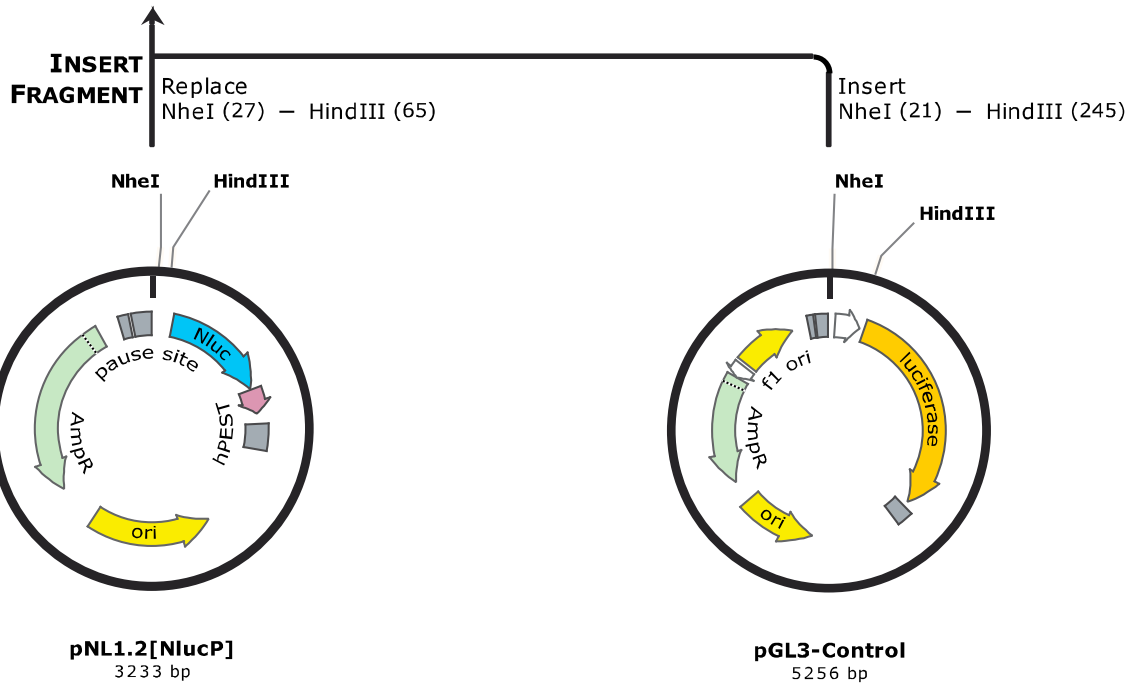

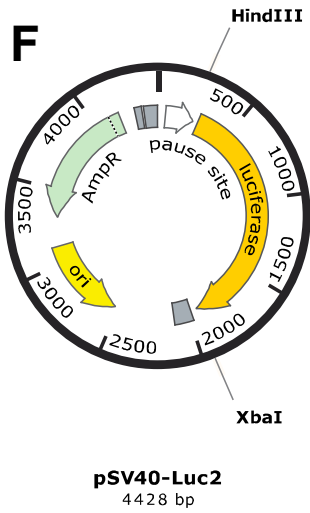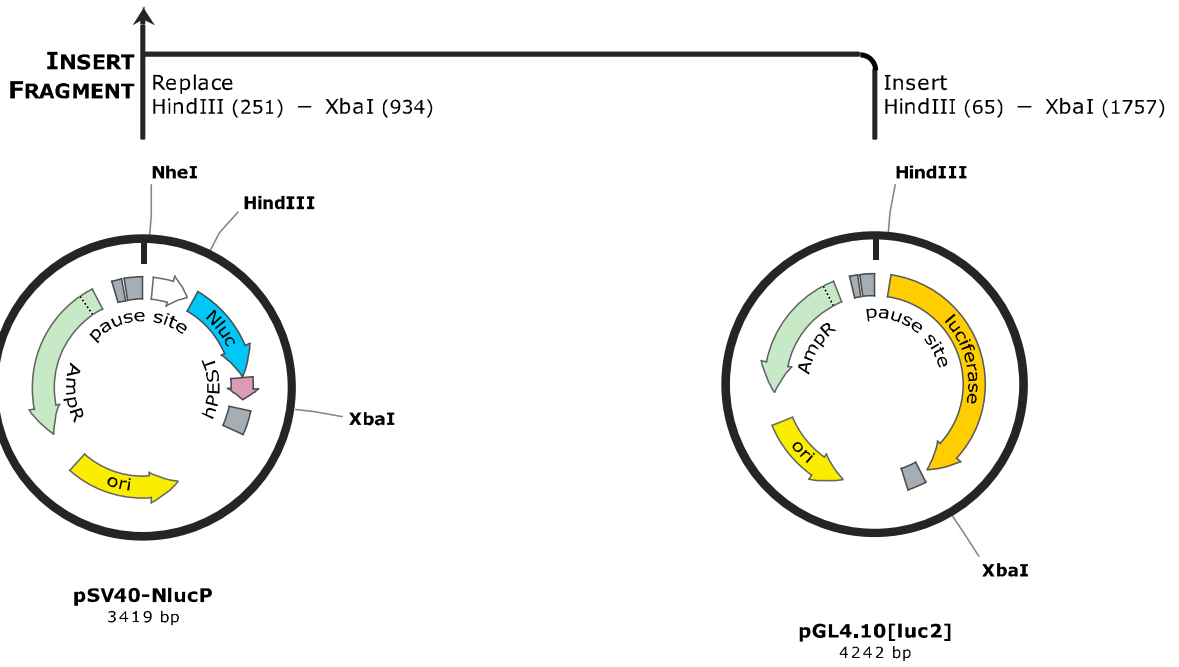

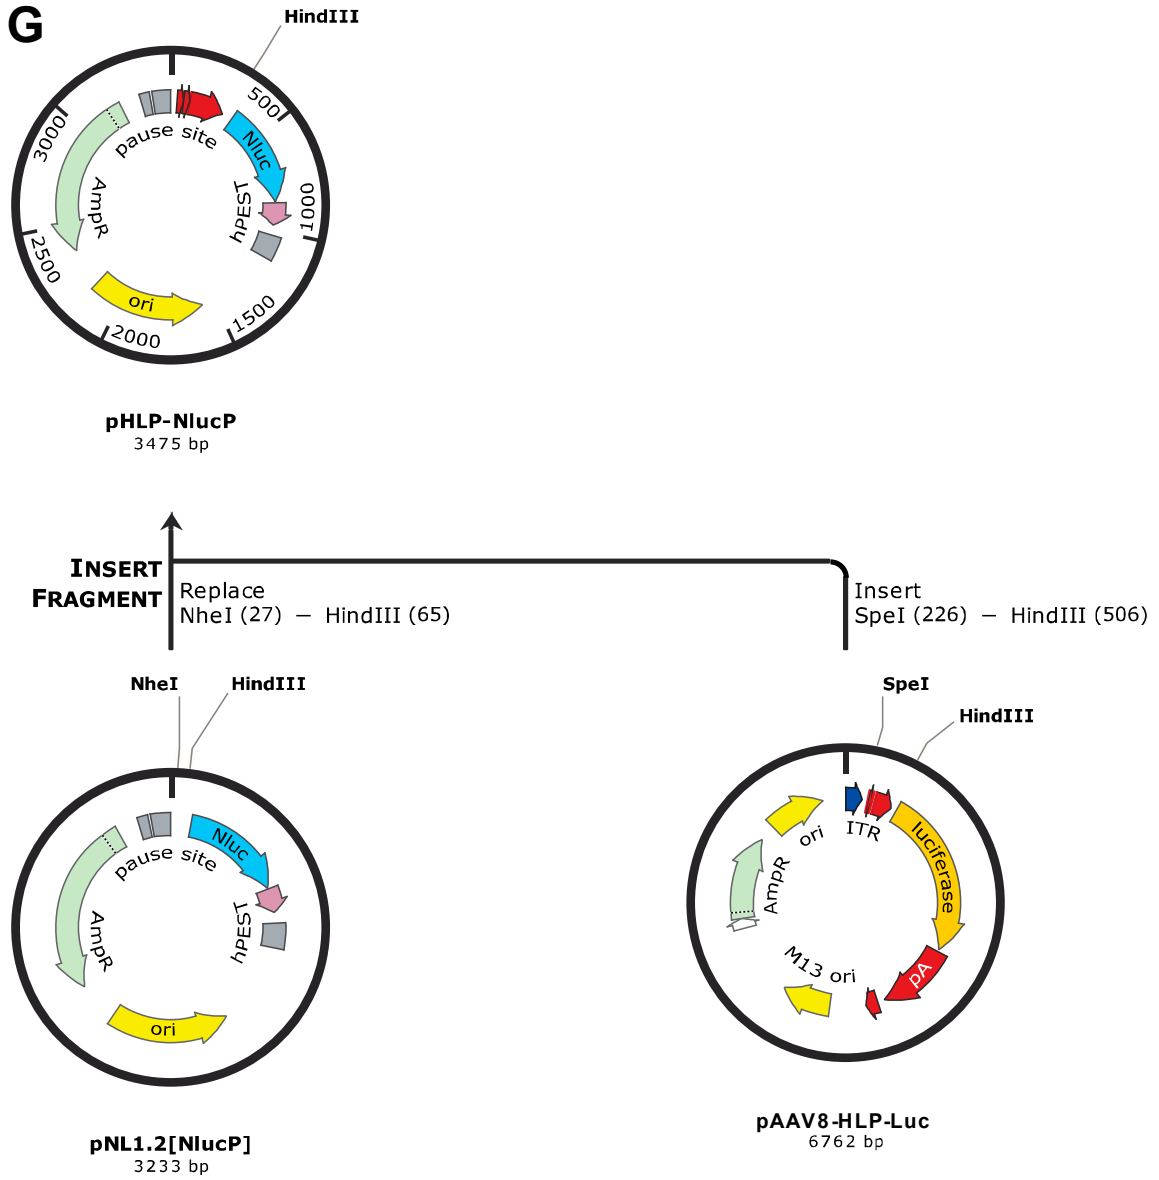

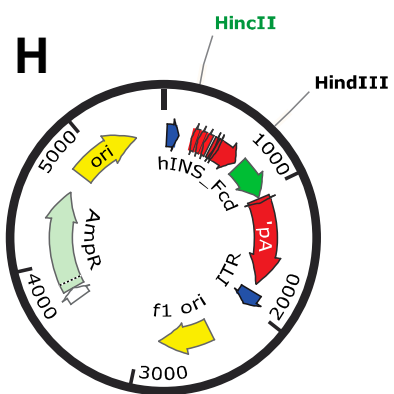

**pAAV8-R3GHLP-hINSco**  
5605 bp

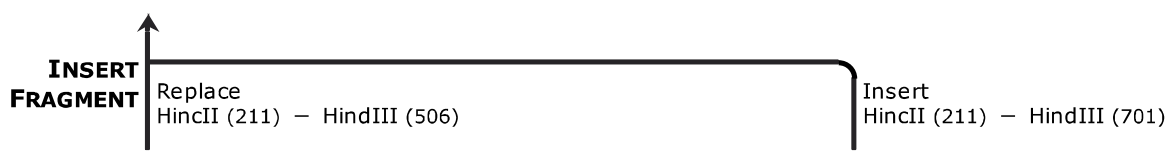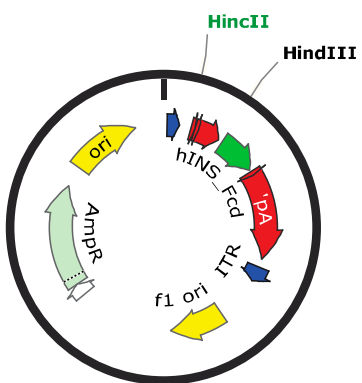

**pAAV8-HLP-hINSco**  
5410 bp

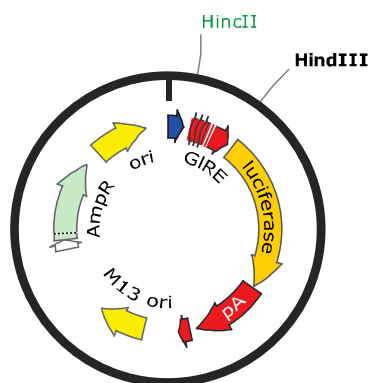

**pAAV8-R3GHLP-Luc**  
6957 bp



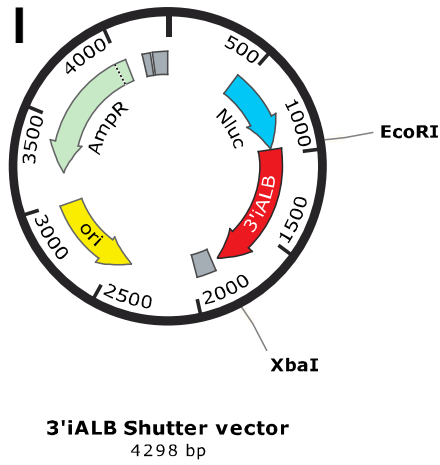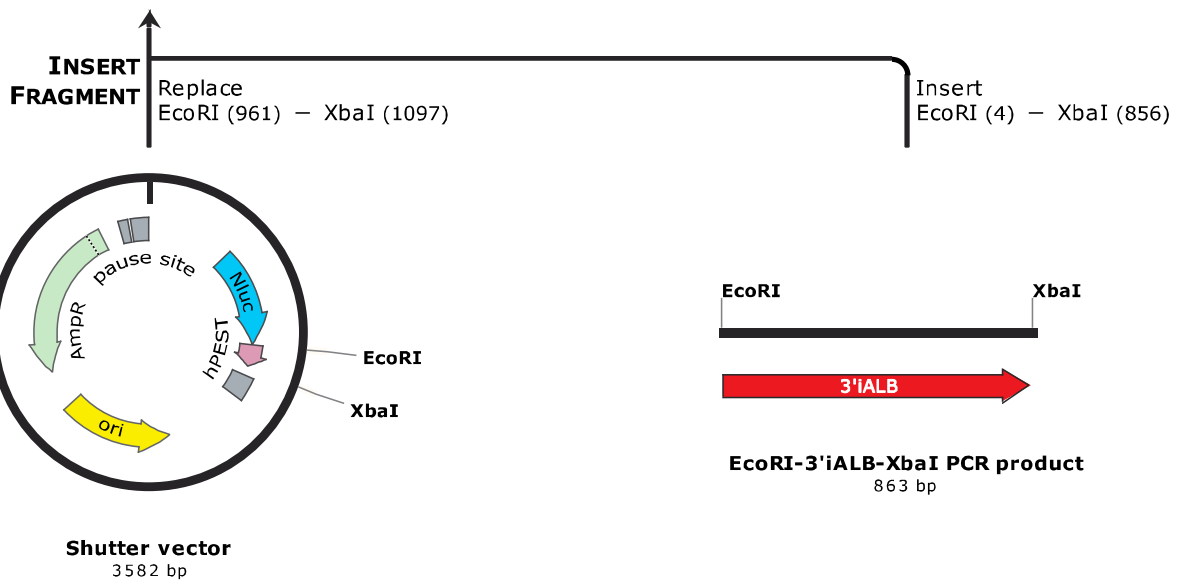

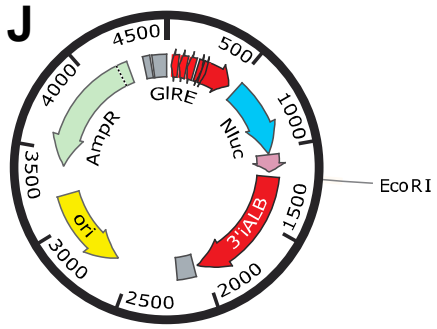

**pR3GHLP-NlucP-e (+)**  
4509 bp

**INSERT FRAGMENT**  
Insert at FseI (1191), overhangs removed

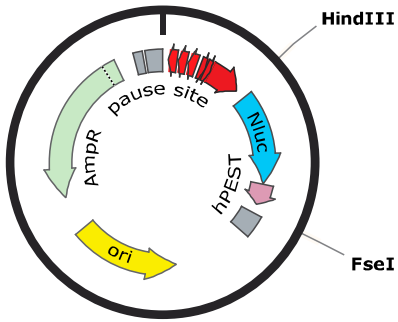

**pR3GHLP-NlucP**  
3657 bp

Insert EcoRI (961), filled-in – XbaI (1813), filled-in

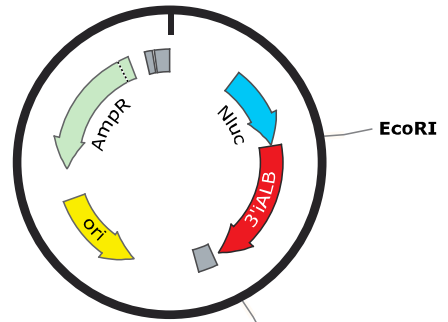

**3'iALB Shutter vector**  
4298 bp

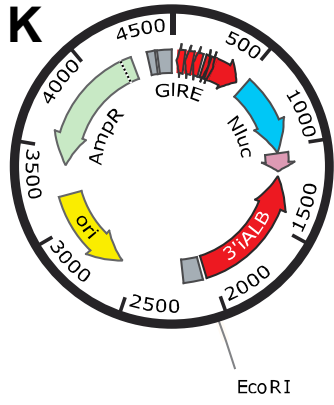

**pR3GHLP-NlucP-e (-)**  
4509 bp

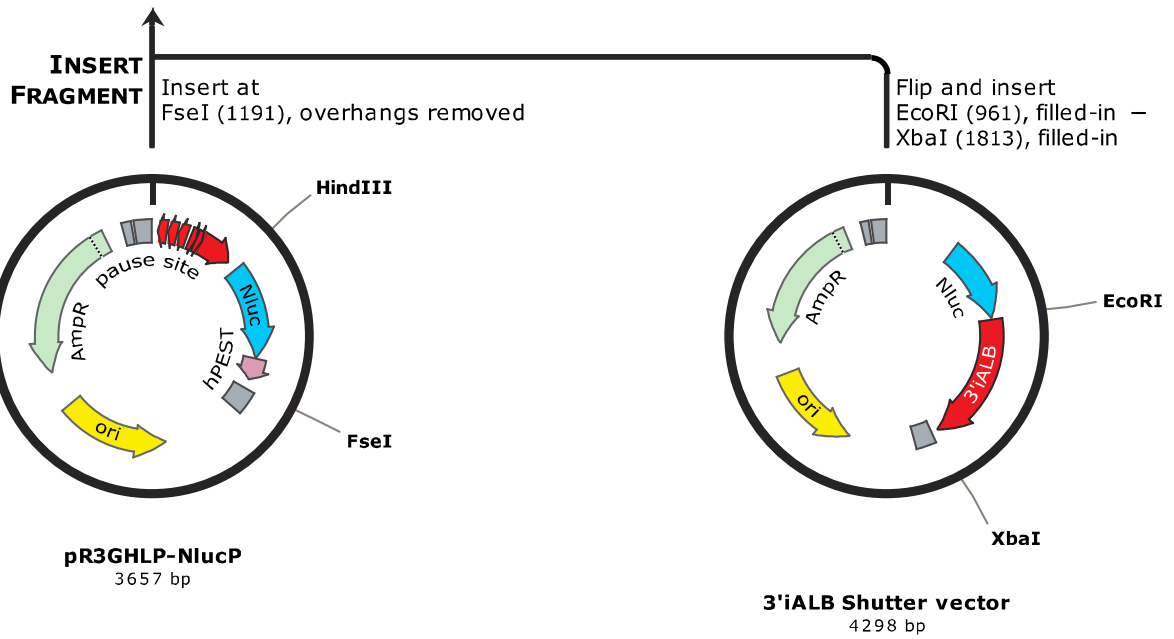

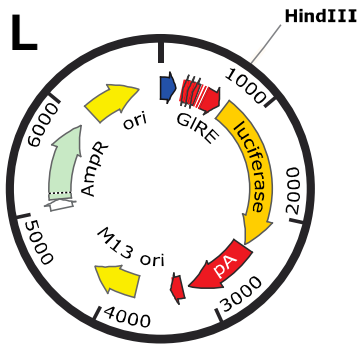

**pAAV8-R3GHLP-Luc**  
6957 bp

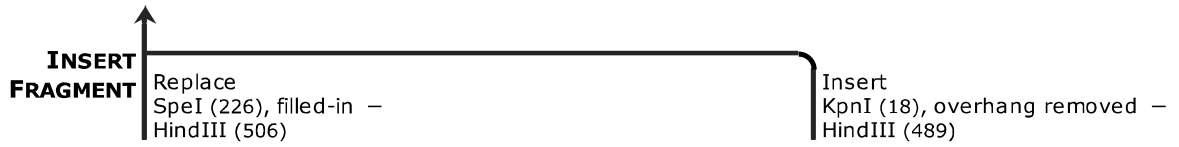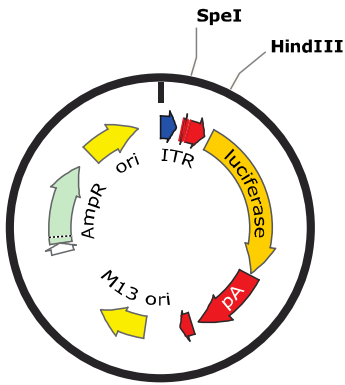

**pAAV8-HLP-Luc**  
6762 bp

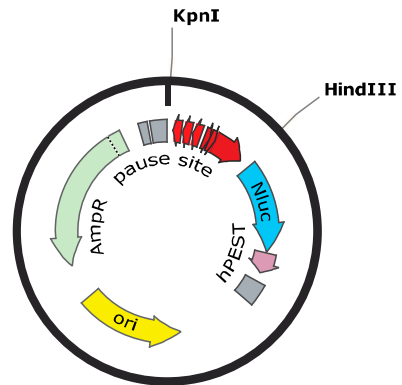

**pR3GHLP-NlucP**  
3657 bp

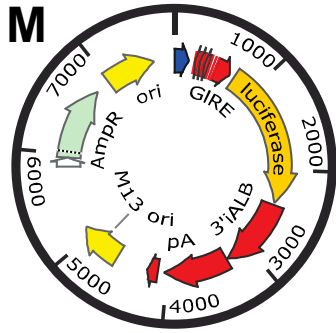

**pAAV8-R3GHLP-Luc-e(+)**  
7817 bp

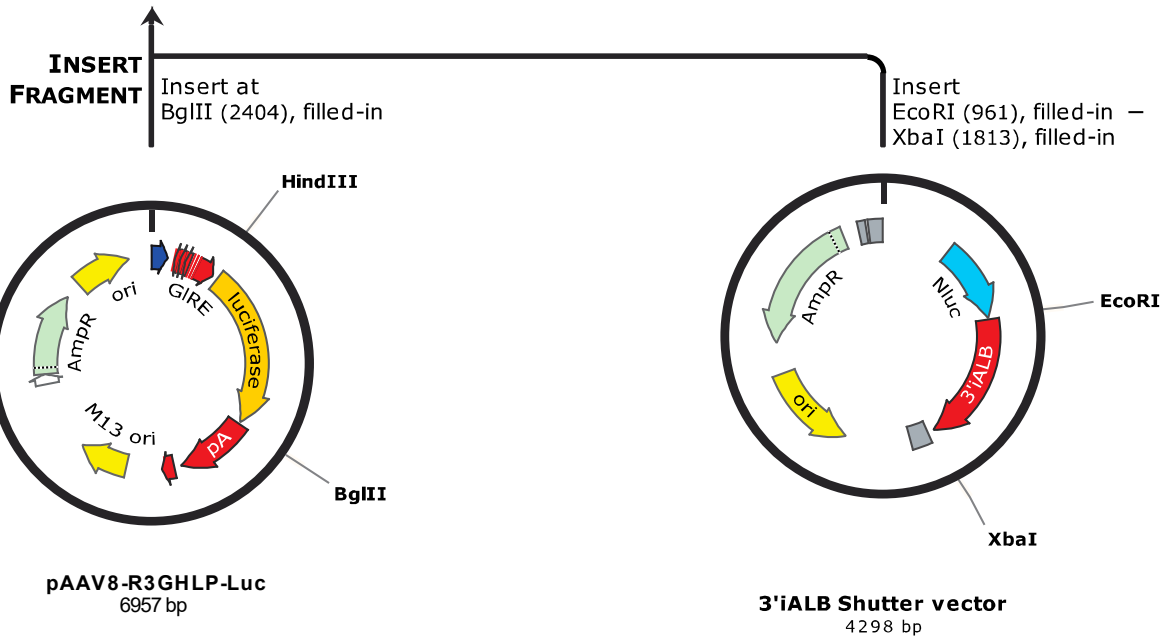

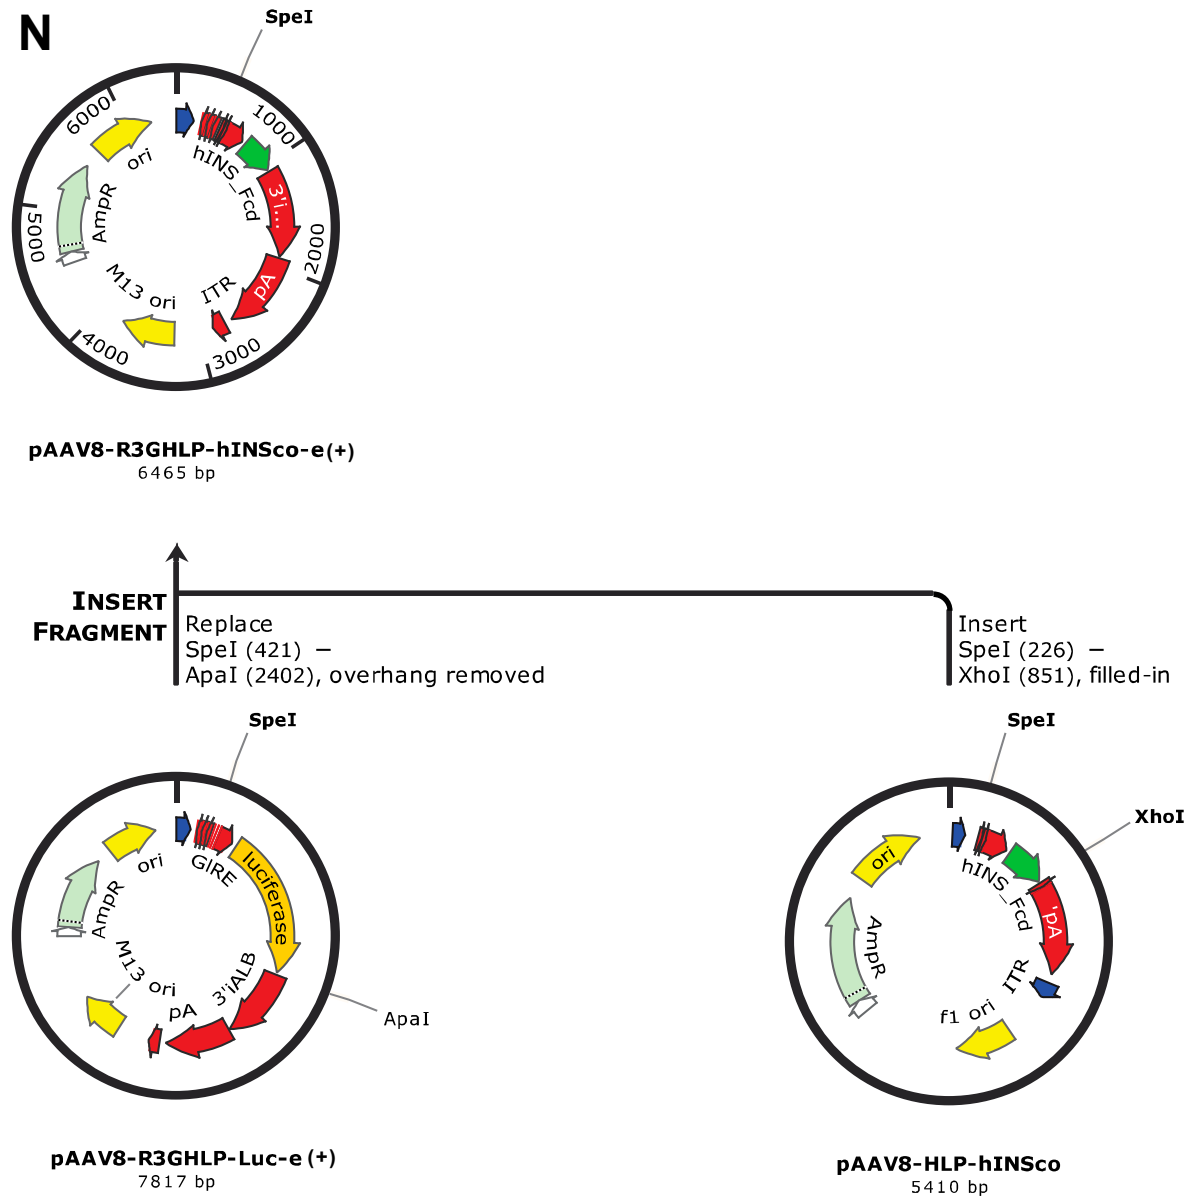

**Supplementary Figure S1.** Schematic diagram of cloning for plasmids used in this study. (A) pIDT-SMART-3xGIRE; (B) pR3GHLP-NlucP; (C) pR3GhLPK-NlucP; (D) pR3GrLPK-NlucP; (E) pSV40-NlucP; (F) pSV40-Luc2; (G) pHLP-NlucP; (H) pAAV8-R3GHLP-hINSco; (I) 3'iALB shutter vector; (J) pR3GHLP-NlucP-e(+); (K) pR3GHLP-NlucP-e(-); (L) pAAV8-R3GHLP-Luc; (M) pAAV8-R3GHLP-Luc-e(+); (N) pAAV8-R3GHLP-hINSco-e(+).

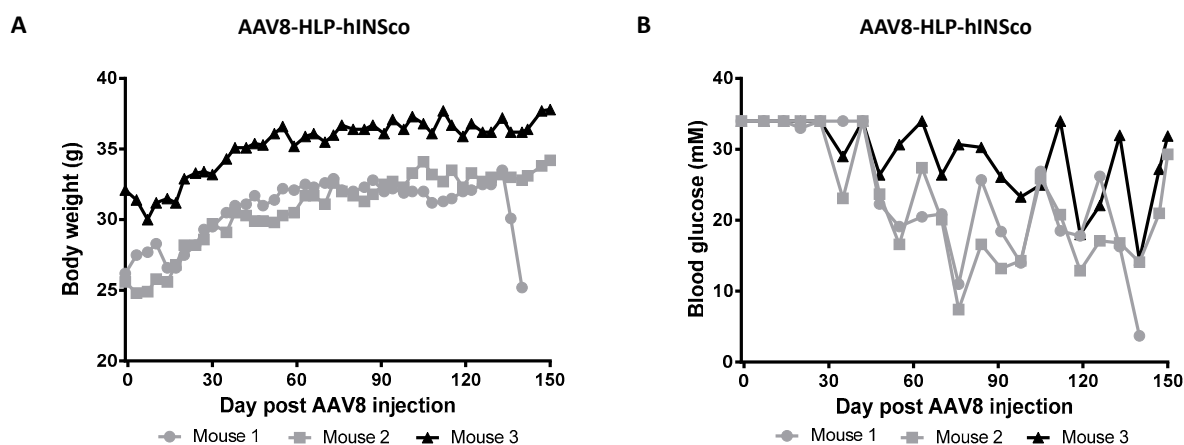

**Supplementary Figure S2.** Detail body weight and blood glucose profiles of mouse 3 in AAV8-HLP-hINSco ( $7.5 \times 10^9$ ) injected group compared to mouse 1 and 2 in the same group. **(A)** Body weight for individual mouse. **(B)** Blood glucose for individual mouse. Mouse 1 was euthanized before endpoint at 140 days post adeno-associated virus serotype 8 (AAV8) injection as it showed dehydration and more than 20% weight loss according to NUS Institutional Animal Care and Use Committee (IACUC) guidelines.

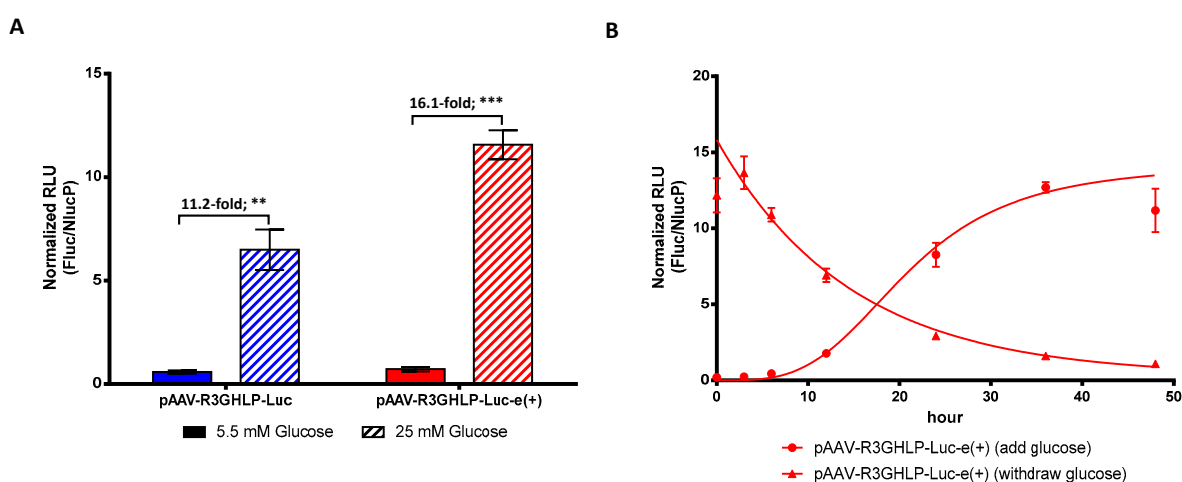

**Supplementary Figure S3.** Functionality assessment of 3' albumin enhancer (3'iALB) in AAV plasmid vector with R3GHLP glucose responsive promoter and firefly luciferase as reporter gene for its enhanced gene expression and glucose responsiveness. **(A)** Glucose responsive gene expression level of pAAV-R3GHLP-Luc-e(+)(forward direction only) containing 3'iALB at 5.5 versus 25 mM glucose. The expression was compared to pAAV-R3GHLP-Luc without 3'iALB.  $n = 3$ . **(B)** Glucose induction and withdrawal effect in pAAV-R3GHLP-Luc-e(+). After overnight transfection, glucose was increase from 5.5 mM to 25 mM in induction group (add glucose) whereas glucose was reduced from 25 mM to 5.5 mM in withdrawal group (withdraw glucose). Luciferase activities were measured at 0, 3, 6, 12, 24, 36, and 48 h,  $n = 6$ . All experiments were performed in vitro with freshly isolated primary rat hepatocytes culture where plasmids were transfected using lipofectamin 3000. Firefly luciferase (Fluc) was used as reporter gene and the expression levels were normalized to PEST-destabilized nanoLuc luciferase (NlucP) activities from co-transfected pSV40-NlucP constitutively expressed control reporter plasmid. All data were presented as mean  $\pm$  s.e.m. Statistical significances were determined by Student's unpaired *t*-test where \*\* indicates  $p < 0.01$  and considered very significant and \*\*\* indicates  $p < 0.001$  and considered extremely significant.
